# Supplementary material for: "Peel my love like an onion" de Ana Castillo: el amor 'antiromántico' y la audiencia mayor
Source: Royal Society of Chemistry journal article supplement (doi:10.1039/c8nr01041b), 2008-01-01
Supplement: c8nr01041b1.pdf [file c8nr01041b1.pdf]

## Supporting Information

### Mechanistic Insights into the Inhibition and Size effects of Graphene Oxide Nanosheets on the Aggregation of an Amyloid- $\beta$ Peptide Fragment

Yujie Chen<sup>†</sup>, Zihan Chen<sup>†</sup>, Yunxiang Sun<sup>†</sup>, Jiangtao Lei<sup>†</sup>, and Guanghong Wei<sup>†,\*</sup>

<sup>†</sup> Department of Physics, State Key Laboratory of Surface physics, Key Laboratory for Computational Physical Science (Ministry of Education), Collaborative Innovation Center of Advanced Microstructures (Nanjing), Fudan University, Shanghai 200433, People's Republic of China

\* Corresponding author: Guanghong Wei, E-mail: ghwei@fudan.edu.cn

**This material contains the description of how to set up partial charge of atoms in oxidation groups of GO nanoparticles, five tables and eight figures.**

**Partial charges setup for atoms in oxidation groups of GO nanoparticles.** The partial charges of atoms in oxidation groups of GO (Fig. S1) were taken from similar groups of three residues (TYR, GLU and ASP) and the base of DNA with minor modification. Oxygen atom in epoxy group (-C-O-C-) have a partial charge of -0.4e, which is similar to the charge of O4' atom in deoxyribonucleic acid (-0.37e, more details can be seen in Table S1). Both of the two carbon atoms in epoxy group have a partial charges of 0.2e and the epoxy group is electric neutral. Based on the hydroxyl group of TYR side chain (Table S2), the charges of oxygen and hydrogen atoms in hydroxyl group (-O-H) were set to be -0.55e and 0.35e, respectively. The carbon atom connected with oxygen atom has a partial charges of 0.2e to ensure the hydroxyl group electroneutral. For carboxyl group (-COO<sup>-</sup>), ASP (Table S3) and GLU (Table S4) were introduced as references. The carbon atom has 0.7e and two oxygen atoms have

equal charges of  $-0.8e$ . The carbon atom which connects to the carbon atoms of carboxyl groups was set to be  $-0.1e$  and the total charge of carboxyl group is  $-1e$  to simulate the deprotonated state. Other carbon atoms didn't mentioned above in the GO are uncharged.

**Table S1-S5:**

| dAMP       |                 | 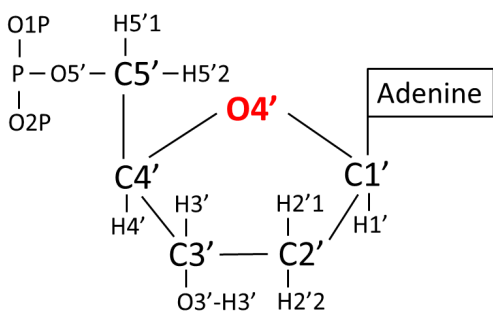 |          |      |          |
|------------|-----------------|------------------------------------------------------------------------------------|----------|------|----------|
| Atom       | Charge          | Atom                                                                               | Charge   | Atom | Charge   |
| P          | 1.16590         | H1'                                                                                | 0.18380  | C2   | 0.57160  |
| O1P        | -0.77610        | N9                                                                                 | -0.02680 | H2   | 0.05980  |
| O2P        | -0.77610        | C8                                                                                 | 0.16070  | N3   | -0.74170 |
| O5'        | -0.49540        | H8                                                                                 | 0.18770  | C4   | 0.38000  |
| C5'        | -0.00690        | N7                                                                                 | -0.61750 | C3'  | 0.07130  |
| H5'1       | 0.07540         | C5                                                                                 | 0.07250  | H3'  | 0.09850  |
| H5'2       | 0.07540         | C6                                                                                 | 0.68970  | C2'  | -0.08540 |
| C4'        | 0.16290         | N6                                                                                 | -0.91230 | H2'1 | 0.07180  |
| H4'        | 0.11760         | H61                                                                                | 0.41670  | H2'2 | 0.07180  |
| <b>O4'</b> | <b>-0.36910</b> | H62                                                                                | 0.41670  | O3'  | -0.52320 |
| C1'        | 0.04310         | N1                                                                                 | -0.76240 |      |          |

**Table S1.** The partial charges of atoms in 2'-Deoxyadenosine 5'-mono-phosphate (dAMP) under the AMBER99SB-ILDN force field.

| TYR  |          |      |                 |      |                |
|------|----------|------|-----------------|------|----------------|
| Atom | Charge   | Atom | Charge          | Atom | Charge         |
| N    | -0.41570 | CG   | -0.00110        | HH   | <b>0.39920</b> |
| H    | 0.27190  | CD1  | -0.19060        | CE2  | -0.23410       |
| CA   | -0.00140 | HD1  | 0.16990         | HE2  | 0.16560        |
| HA   | 0.08760  | CE1  | -0.23410        | CD2  | -0.19060       |
| CB   | -0.01520 | HE1  | 0.16560         | HD2  | 0.16990        |
| HB1  | 0.02950  | CZ   | 0.32260         | C    | 0.59730        |
| HB2  | 0.02950  | OH   | <b>-0.55790</b> | O    | -0.56790       |

**Table S2.** The partial charges of atoms in Tyrosine (TYR) under the AMBER99SB-ILDN force field.

| ASP  |          |      |                |      |                 |
|------|----------|------|----------------|------|-----------------|
| Atom | Charge   | Atom | Charge         | Atom | Charge          |
| N    | -0.51630 | CB   | -0.03030       | OD1  | <b>-0.80140</b> |
| H    | 0.29360  | HB1  | -0.01220       | OD2  | <b>-0.80140</b> |
| CA   | 0.03810  | HB2  | -0.01220       | C    | 0.53660         |
| HA   | 0.08800  | CG   | <b>0.79940</b> | O    | -0.58190        |

**Table S3.** The partial charges of atoms in Aspartate (ASP) under the AMBER99SB-ILDN force field.

| <b>GLU</b> |          |      |          |            |                 |
|------------|----------|------|----------|------------|-----------------|
| Atom       | Charge   | Atom | Charge   | Atom       | Charge          |
| N          | -0.51630 | HB1  | -0.01730 | <b>CD</b>  | <b>0.80540</b>  |
| H          | 0.29360  | HB2  | -0.01730 | <b>OE1</b> | <b>-0.81880</b> |
| CA         | 0.03970  | CG   | 0.01360  | <b>OE2</b> | <b>-0.81880</b> |
| HA         | 0.11050  | HG1  | -0.04250 | C          | 0.53660         |
| CB         | 0.05600  | HG2  | -0.04250 | O          | -0.58190        |

**Table S4.** The partial charges of atoms in Glutamic (GLU) under the AMBER99SB-ILDN force field.

| Replicas | $A\beta_{33-42}$ | $A\beta_{33-42}$<br>+4GO <sub>60</sub> | $A\beta_{33-42}$<br>+2GO <sub>120</sub> | Replicas | $A\beta_{33-42}$ | $A\beta_{33-42}$<br>+4GO <sub>60</sub> | $A\beta_{33-42}$<br>+2GO <sub>120</sub> |
|----------|------------------|----------------------------------------|-----------------------------------------|----------|------------------|----------------------------------------|-----------------------------------------|
| 1        | 307.00           | 307.50                                 | 307.50                                  | 25       | 368.57           | 369.97                                 | 368.11                                  |
| 2        | 309.39           | 309.92                                 | 309.86                                  | 26       | 371.34           | 372.79                                 | 370.82                                  |
| 3        | 311.79           | 312.36                                 | 312.23                                  | 27       | 374.13           | 375.62                                 | 373.55                                  |
| 4        | 314.20           | 314.81                                 | 314.62                                  | 28       | 376.93           | 378.47                                 | 376.30                                  |
| 5        | 316.64           | 317.28                                 | 317.02                                  | 29       | 379.75           | 381.33                                 | 379.07                                  |
| 6        | 319.08           | 319.76                                 | 319.44                                  | 30       | 382.59           | 384.22                                 | 381.83                                  |
| 7        | 321.55           | 322.25                                 | 321.86                                  | 31       | 385.45           | 387.12                                 | 384.64                                  |
| 8        | 324.02           | 324.77                                 | 324.31                                  | 32       | 388.26           | 390.03                                 | 387.45                                  |
| 9        | 326.52           | 327.29                                 | 326.77                                  | 33       | 391.15           | 392.97                                 | 390.28                                  |
| 10       | 329.03           | 329.84                                 | 329.24                                  | 34       | 394.06           | 395.93                                 | 393.13                                  |
| 11       | 331.56           | 332.40                                 | 331.72                                  | 35       | 396.99           | 398.91                                 | 395.99                                  |
| 12       | 334.10           | 334.98                                 | 334.22                                  | 36       | 399.94           | 401.91                                 | 398.88                                  |

|    |        |        |        |    |        |        |        |
|----|--------|--------|--------|----|--------|--------|--------|
| 13 | 336.66 | 337.57 | 336.73 | 37 | 402.91 | 404.92 | 401.78 |
| 14 | 339.23 | 340.17 | 339.26 | 38 | 405.88 | 407.96 | 404.69 |
| 15 | 341.82 | 342.80 | 341.81 | 39 | 408.88 | 411.01 | 407.62 |
| 16 | 344.42 | 345.44 | 344.37 | 40 | 411.91 | 414.08 | 410.57 |
| 17 | 347.04 | 348.10 | 346.94 | 41 | 414.95 | 417.17 | 413.53 |
| 18 | 349.67 | 350.77 | 349.53 | 42 | 418.01 | 420.29 | 416.51 |
| 19 | 352.32 | 353.46 | 352.14 | 43 | 421.08 | 423.42 | 419.52 |
| 20 | 354.99 | 356.17 | 354.76 | 44 | 424.18 | 426.57 | 422.54 |
| 21 | 357.68 | 358.90 | 357.40 | 45 | 427.31 | 429.74 | 425.58 |
| 22 | 360.38 | 361.64 | 360.05 | 46 | 430.44 | 432.93 | 428.64 |
| 23 | 363.09 | 364.40 | 362.72 | 47 | 433.62 | 436.14 | 431.71 |
| 24 | 365.82 | 367.18 | 365.41 | 48 | 436.79 | 439.37 | 434.81 |

**Table S5.** Temperature list of 48 replicas in each system (307-436.79 K for  $A\beta_{33-42}$  system; 307.5-439.7 K for  $A\beta_{33-42}+4GO_{60}$  system; 307.5-450.59 K for  $A\beta_{33-42}+2GO_{120}$  system).

**Figure S1-S8:**

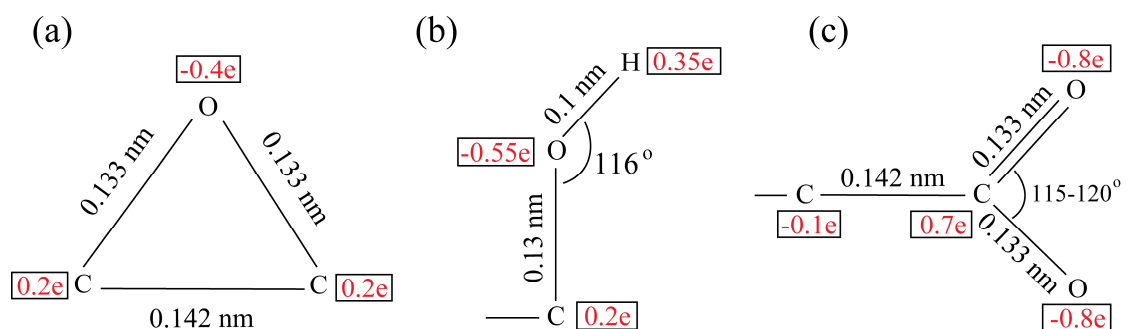

**Figure S1.** Illustrations of partial charges of the atoms in (a) epoxy group, (b) hydroxyl group and (c) carboxyl group

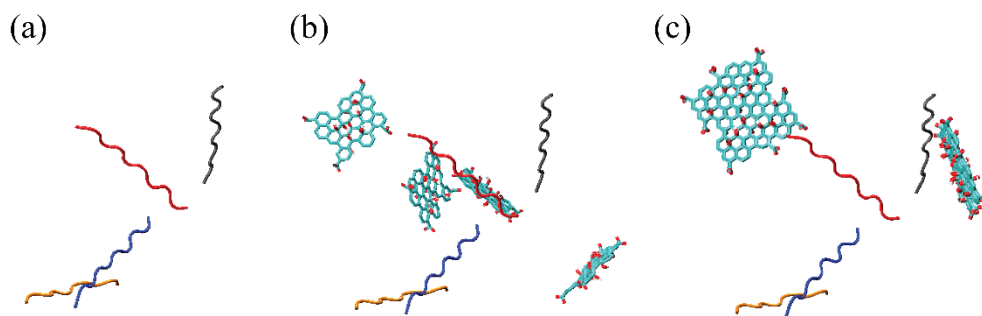

**Figure S2.** The initial states of (a)  $A\beta_{33-42}$  system, (b)  $A\beta_{33-42}+4GO_{60}$  system and (c)  $A\beta_{33-42}+2GO_{120}$  system.

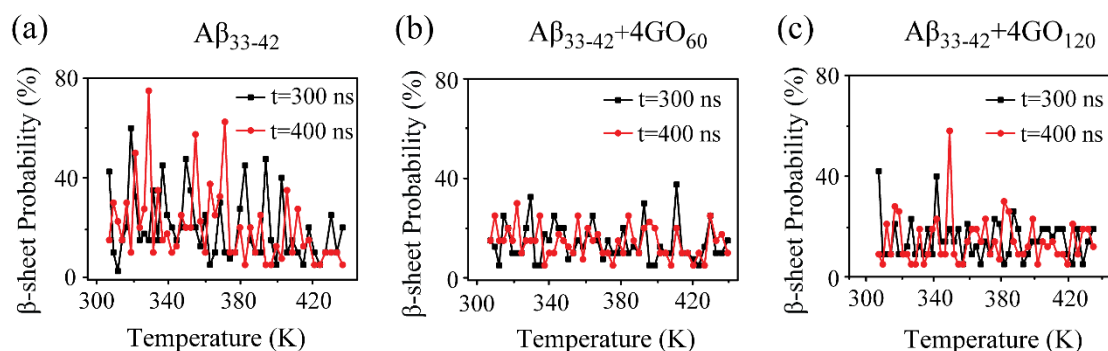

**Figure S3.** The probability of  $\beta$ -sheet among 48 temperature replicas at 300 ns and 400 ns. (a)  $A\beta_{33-42}$  system, (b)  $A\beta_{33-42}+4GO_{60}$  system, (c)  $A\beta_{33-42}+2GO_{120}$  system.

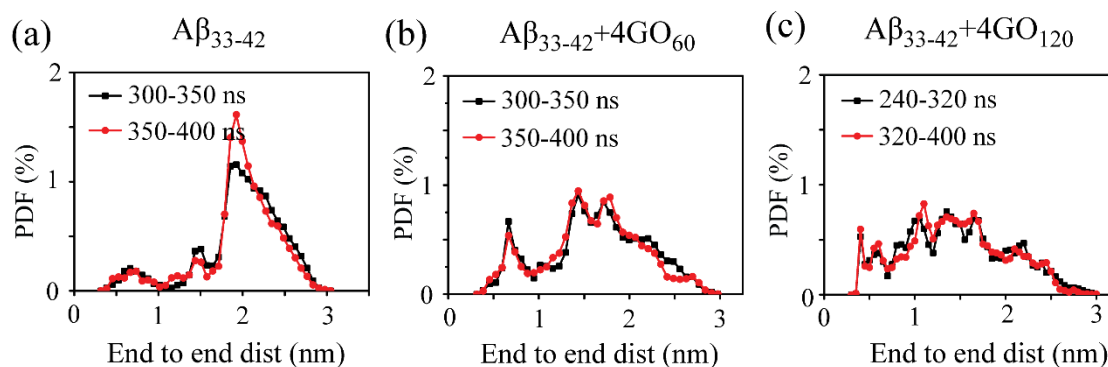

**Figure S4.** The probability density function (PDF) of end-to-end distances of all peptide chains within two time intervals for (a)  $A\beta_{33-42}$  system, (b)  $A\beta_{33-42}+4GO_{60}$  system, (c)  $A\beta_{33-42}+2GO_{120}$  system.

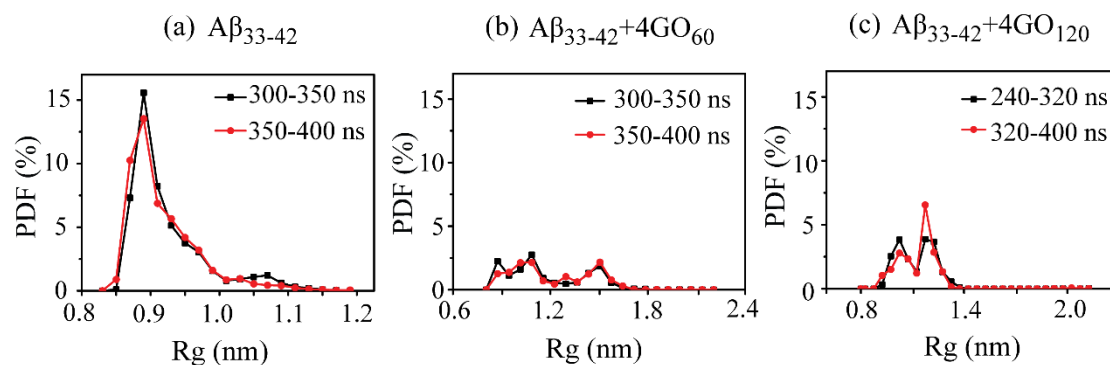

**Figure S5.** The PDF of the radius of gyration of the A $\beta$ -tetramer within two time intervals in (a) A $\beta_{33-42}$  system, (b) A $\beta_{33-42}+4GO_{60}$  system, (c) A $\beta_{33-42}+2GO_{120}$  system.

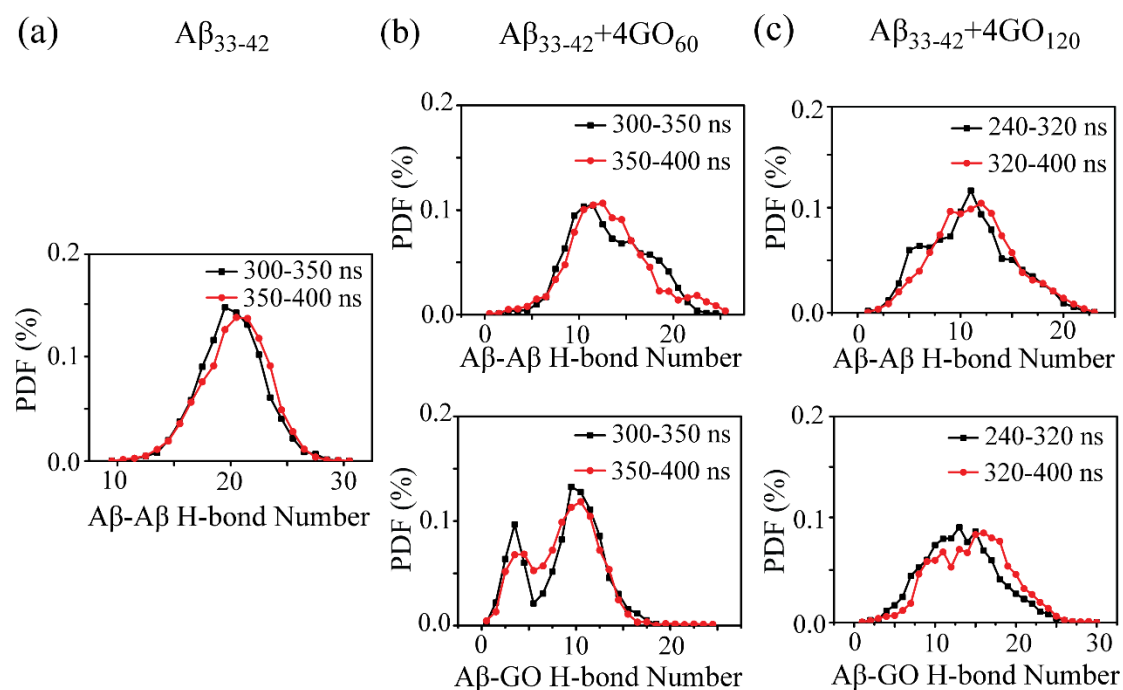

**Figure S6.** The PDF of the H-bond number of peptide-peptide and peptide-GO within two time intervals for (a) A $\beta_{33-42}$  system, (b) A $\beta_{33-42}+4GO_{60}$  system, (c) A $\beta_{33-42}+2GO_{120}$  system.

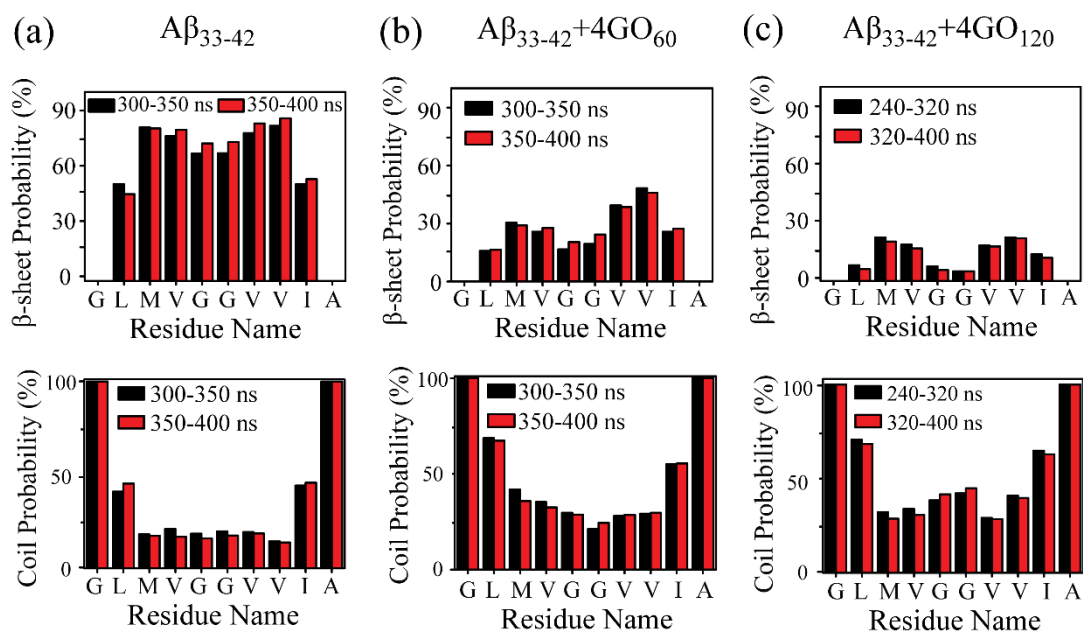

**Figure S7.** The calculated secondary structure (coil and  $\beta$ -sheet) probability of each residue in the REMD runs for  $A\beta$ -tetramer in three systems within two time intervals for (a)  $A\beta_{33-42}$  system, (b)  $A\beta_{33-42}+4GO_{60}$  system, (c)  $A\beta_{33-42}+2GO_{120}$  system.

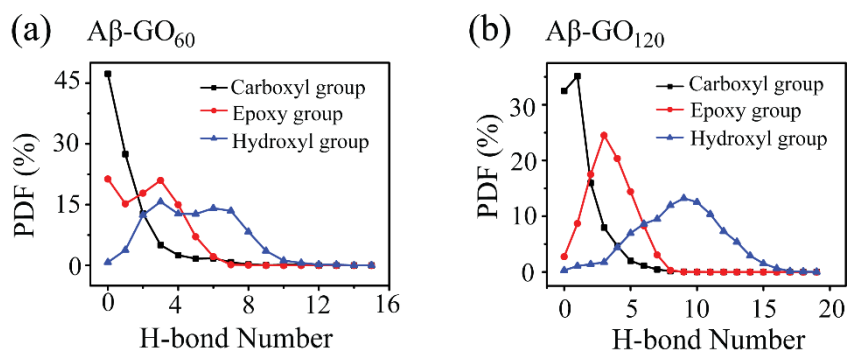

**Figure S8.** The PDF of H-bond number between  $A\beta$  and different oxidation groups (carboxyl group, epoxy group and hydroxyl group) of GO. (a)  $A\beta_{33-42}+4GO_{60}$  system. (b)  $A\beta_{33-42}+2GO_{120}$  system.
